# Supplementary material for: Global field synchronization reveals rapid eye movement sleep as most synchronized brain state in the human EEG
Source: PubMed Central journal article supplement (PMC5098962; doi:10.1098/rsos.160201), 2016-10-12
Supplement: rsos160201supp1.pdf [file rsos160201supp1.pdf]

### Supplementary material

Achermann P, Rusterholz T, Dürr R, König T, Tarokh L. 2016 *Global field synchronization reveals rapid eye movement sleep as most synchronized brain state in the human EEG*. R. Soc. open sci. 3: 160201.  
<http://dx.doi.org/10.1098/rsos.160201>

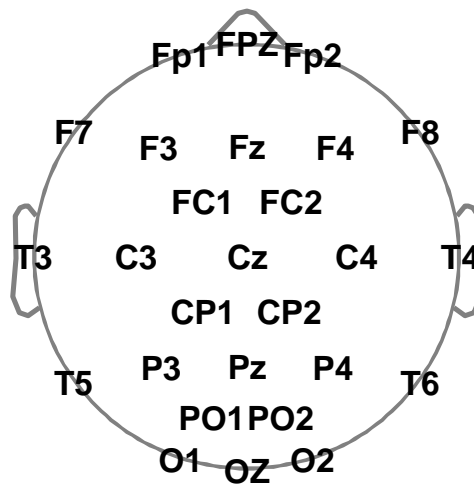

**Supplementary Figure S1:** Name and location of the 27 electrodes projected onto a 2D surface used in the current study. Electrode position is at the center of the label.

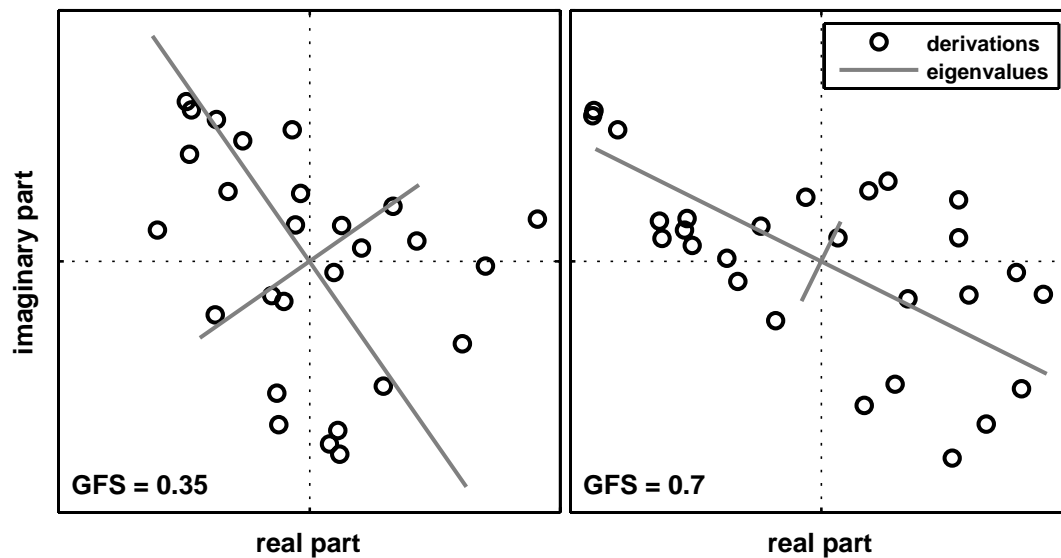

**Supplementary Figure S2:** Illustration of GFS determination in complex plane for  $f=12$  Hz. Circles represent single EEG derivations and the length of the grey lines corresponds to the two eigenvalues  $\lambda_1$  and  $\lambda_2$  (see Methods).

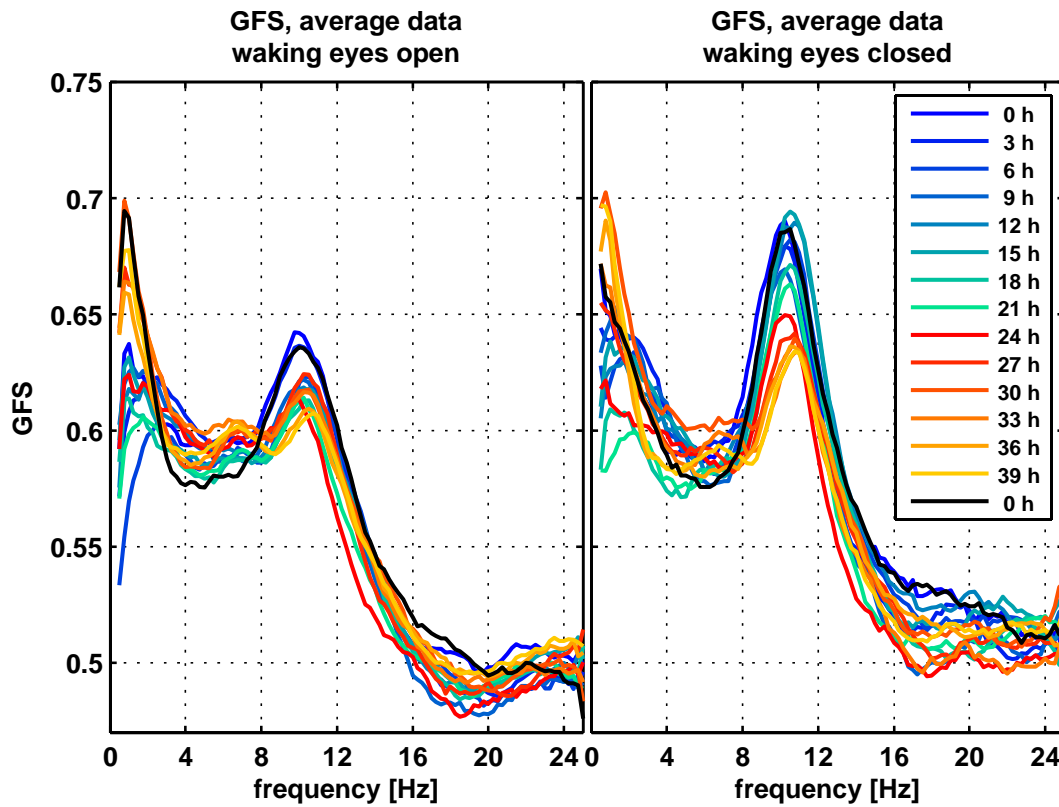

**Supplementary Figure S3:** Subject average GFS spectra (smoothed, 9-point moving average; only for visualization purposes) of the wake EEG eyes open and eyes closed during sustained wakefulness of 40 h. Figure legend refers to the number of hours awake. Blue 0 h awake is after a baseline night of sleep while the 0 h wake in black is after a night of recovery sleep following sleep deprivation.
